# Supplementary material for: The buoyancy of cryptococcal cells and its implications for transport and persistence of Cryptococcus in aqueous environments
Source: PubMed Central journal article supplement — bioRxiv. 2024 May 21:2024.05.20.595024. Preprint. [Version 1] doi: 10.1101/2024.05.20.595024 (PMC11142132; doi:10.1101/2024.05.20.595024), 2024-05-21
Supplement: NIHPP2024.05.20.595024v1-supplement-1.pdf [file NIHPP2024.05.20.595024v1-supplement-1.pdf]

810 **Supplemental Tables**

811 **Supplemental Table 1: Concentrations and specific gravity of sodium chloride solutions**

| <b>[NaCl] (g/L)</b> | <b>Molarity (M)</b> | <b>Specific gravity</b> |
|---------------------|---------------------|-------------------------|
| 1.5                 | 0.026               | 1.002                   |
| 3                   | 0.051               | 1.003                   |
| 9.5                 | 0.163               | 1.007                   |
| 21.2                | 0.363               | 1.016                   |
| 39.5                | 0.676               | 1.028                   |
| 88                  | 1.506               | 1.060                   |

812

813

814

815 Supplemental Figure 1.  
816

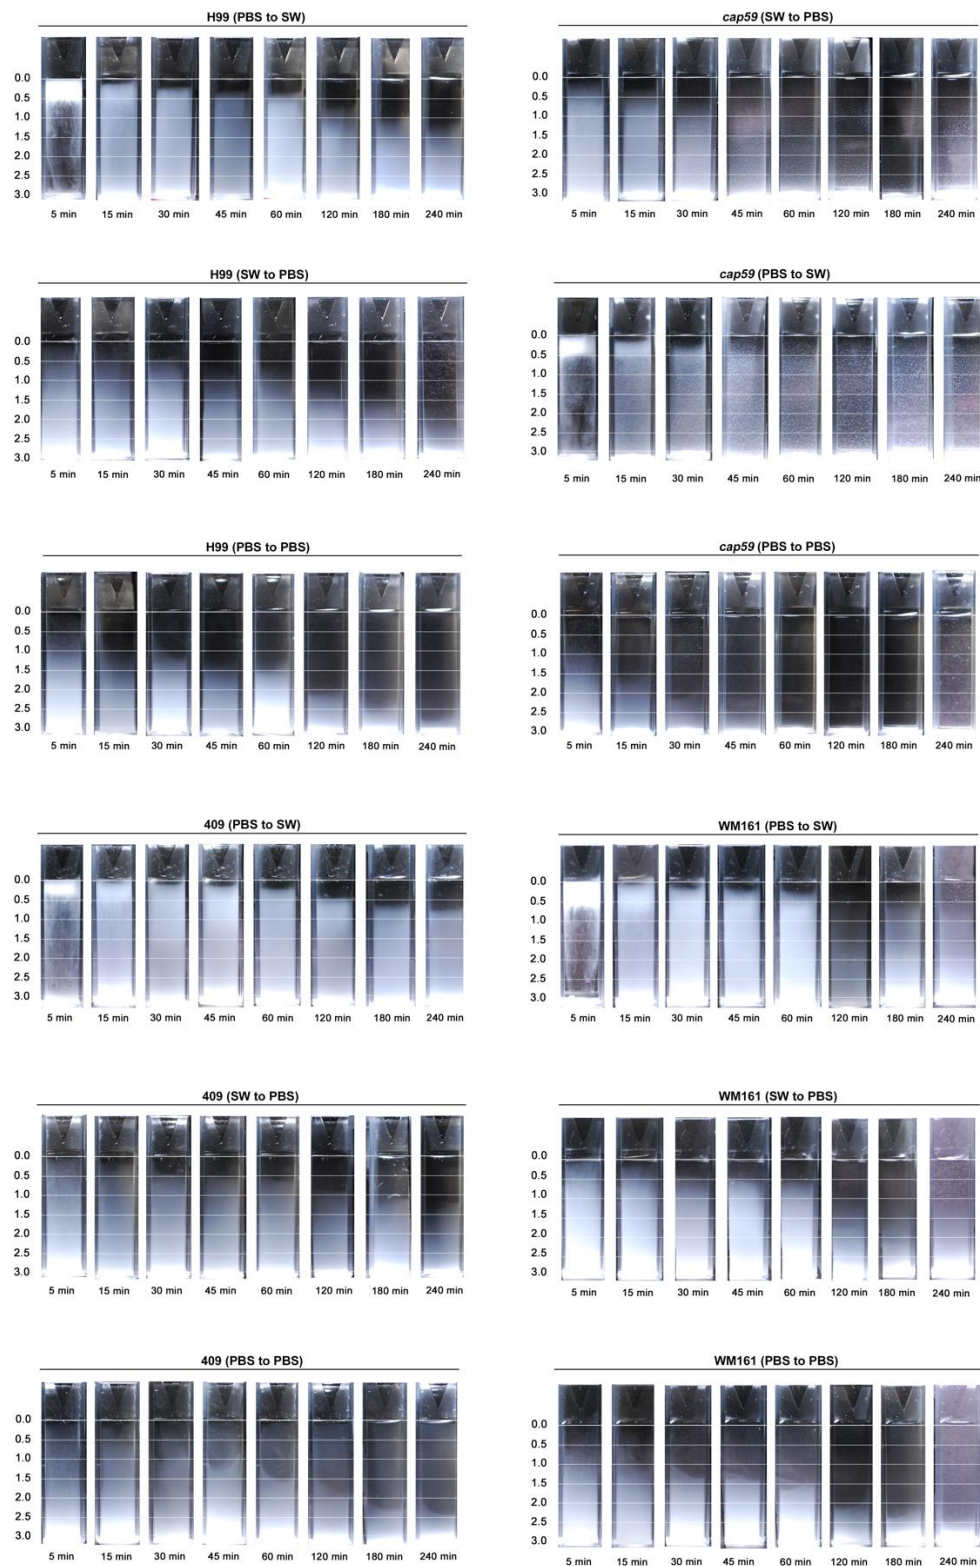

817  
818

819  
820  
821

Supplemental Figure 2.

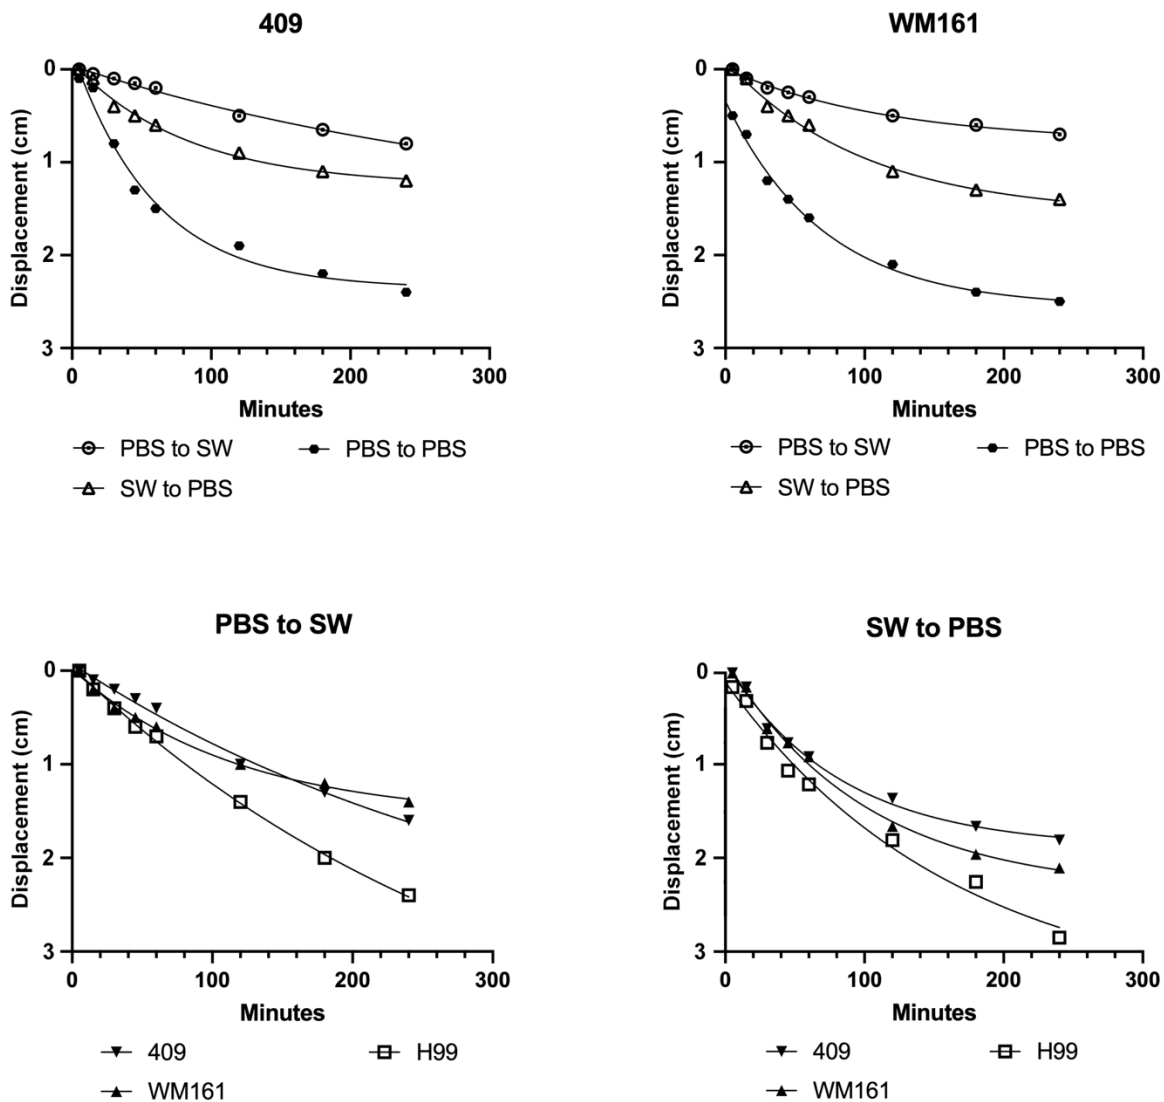

822  
823  
824

825 Supplemental Figure 3

826

827

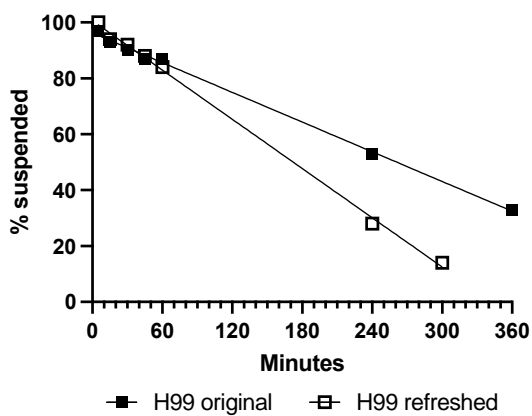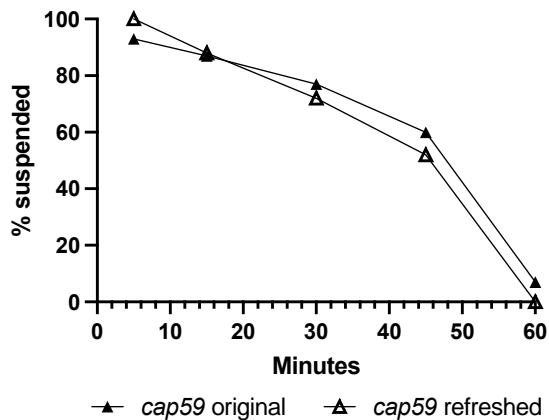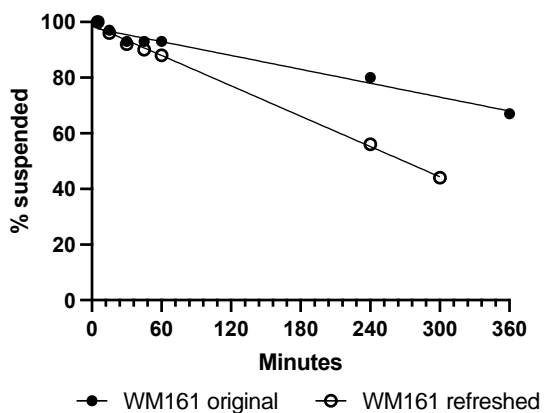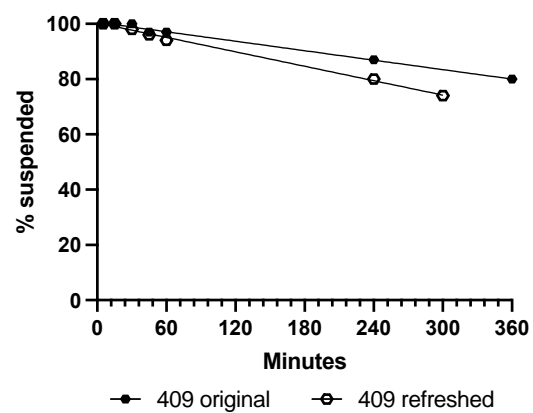

828

829

830

831
